# Supplementary material for: Synthesis of a germanium analogue of a dithiocarboxylic acid anhydride from the Ge(i) pyridyl-1-azaallyl dimer
Source: Royal Society of Chemistry journal article supplement (doi:10.1039/b916326c), 2009-01-01
Supplement: b916326c.pdf [file b916326c.pdf]

# Synthesis of a germanium analogue of a dithiocarboxylic acid anhydride from the Ge(I) pyridyl-1-azaallyl dimer

*Wing-Por Leung,\* Wang-Kin Chiu, Kim-Hung Chong, and Thomas C. W. Mak*

Department of Chemistry, The Chinese University of Hong Kong, Shatin, New Territories, Hong Kong,

People's Republic of China

## Supplementary Material

### Experimental Section

**General procedures.** All manipulations were carried out under an inert atmosphere of dinitrogen gas by standard Schlenk techniques. Solvents were dried over and distilled from CaCl<sub>2</sub> (CH<sub>2</sub>Cl<sub>2</sub>) and/or Na (Et<sub>2</sub>O, toluene and THF). Compound **1** [Ge{N(SiMe<sub>3</sub>)C(Ph)C(SiMe<sub>3</sub>)(C<sub>5</sub>H<sub>4</sub>N-2)}Cl] was prepared according to the literature procedures.<sup>1</sup> Lithium metals and anhydrous sulfur powder were purchased from Aldrich Chemical Co. and used without further purification. The <sup>1</sup>H and <sup>13</sup>C NMR spectra were recorded on Brüker WM-300 or Varian 400 spectrometers. The NMR spectra were recorded in THF-*d*<sub>8</sub> or benzene-*d*<sub>6</sub> and the chemical shifts  $\delta$  are relative to SiMe<sub>4</sub>.

**Synthesis of Compound 2.** A solution of [Ge{N(SiMe<sub>3</sub>)C(Ph)C(SiMe<sub>3</sub>)(C<sub>5</sub>H<sub>4</sub>N-2)}Cl] (**1**) (0.81g, 1.82 mmol) in THF (25 ml) was added slowly to a stirring suspension of lithium powder (0.013g, 1.87 mmol) in THF (30 ml) at -90 °C. The resultant dark green mixture was warmed to ambient temperature and stirred for 12 h. The solution was filtered and the volatiles were removed under reduced pressure. The black green residue was extracted with Et<sub>2</sub>O. After filtration, concentration of filtrate and storage at 0 °C afforded dark green crystals. Yield: 0.16g (21%). Mp: 226-230 °C. Anal. Found: C 54.79, H 7.16, N 7.06. Calcd for C<sub>38</sub>H<sub>54</sub>Ge<sub>2</sub>N<sub>4</sub>Si<sub>4</sub>: C 55.31, H 6.60, N 6.79. <sup>1</sup>H NMR (benzene-*d*<sub>6</sub>):  $\delta$  = 0.24 (s, 9H, SiMe<sub>3</sub>), 0.26 (s, 9H, SiMe<sub>3</sub>), 6.06-6.12 (m, 1H, 5-py), 7.17-7.39 (m, 5H, Ph), 7.41-7.45 (m, 1H, 3-py), 7.78-7.82 (m, 1H, 4-py), 8.09-8.11 (d, 1H, 6-py). <sup>13</sup>C{<sup>1</sup>H} NMR (benzene-*d*<sub>6</sub>):  $\delta$  = 2.63, 3.74 (SiMe<sub>3</sub>), 114.215 (CSiMe<sub>3</sub>), 124.65, 130.01, 138.08, 142.23, 143.54, 145.94, 147.97, 156.45, 159.53 (Ph and Py), 164.60 (NCPH).

**Synthesis of Compound 4.** A solution of [ {[N(SiMe<sub>3</sub>)C(Ph)C(SiMe<sub>3</sub>)(C<sub>5</sub>H<sub>4</sub>N-2)]Ge<sub>2</sub>}]

(**2**) (1.65g, 2.00 mmol) in toluene (25 ml) was added slowly to a stirring suspension of sulfur powder (0.115g, 3.59 mmol) in toluene (15 ml) at 0 °C. The resultant yellowish-orange solution was warmed to room temperature and stirred for another 18h. The volatiles were then removed under reduced pressure and extracted with CH<sub>2</sub>Cl<sub>2</sub> (20 ml). The extract was then added with 2 ml of toluene. Concentration of the extract afforded yellow crystals. Yield: 0.59g (32%). Mp: 273-278 °C. Anal. Found: C 50.05, H 6.11, N 6.42. Calcd for C<sub>38</sub>H<sub>54</sub>Ge<sub>2</sub>N<sub>4</sub>S<sub>3</sub>Si<sub>4</sub>: C 49.53, H 5.91, N 6.08. <sup>1</sup>H NMR (THF-*d*<sub>8</sub>): δ = -0.01 (s, 9H, SiMe<sub>3</sub>), 0.16 (s, 9H, SiMe<sub>3</sub>), 6.60-6.64 (t, 1H, 5-py), 7.02-7.28 (m, 5H, Ph), 7.36-7.40 (d, 1H, 3-py), 7.50-7.52 (t, 1H, 4-py), 7.81-7.83 (d, 1H, 6-py). <sup>13</sup>C{<sup>1</sup>H} NMR (THF-*d*<sub>8</sub>): δ = 2.63, 3.31 (SiMe<sub>3</sub>), 118.66 (CSiMe<sub>3</sub>), 125.18, 128.08, 129.56, 131.50, 136.63, 137.37, 144.60, 146.18, 147.16 (Ph and Py), 159.18 (NCPh).

**X-ray crystallography.** Single crystals were sealed in Lindemann glass capillaries under nitrogen. X-ray data of **2** and **4** were collected on a Rigaku R-Axis II imaging plate using graphite-monochromatized Mo K $\alpha$  radiation ( $\lambda = 0.71073 \text{ \AA}$ ) from a rotating-anode generator operating at 50kV and 90mA. Crystal data are summarized in Table 1. The structures were solved by direct phase determination using the computer program SHELXTL-PC<sup>1</sup> on a PC 486 and refined by full-matrix least squares with anisotropic thermal parameters for the non-hydrogen atoms. Hydrogen atoms were introduced in their idealized positions and included in structure factor calculations with assigned isotropic temperature factor calculations.

**Table 1.** Crystallographic Data for Compound **2** and **4**

|                                                 | <b>2</b>                                                                       | <b>4</b>                                                                                      |
|-------------------------------------------------|--------------------------------------------------------------------------------|-----------------------------------------------------------------------------------------------|
| Formula                                         | C <sub>38</sub> H <sub>54</sub> Ge <sub>2</sub> N <sub>4</sub> Si <sub>4</sub> | C <sub>38</sub> H <sub>54</sub> Ge <sub>2</sub> N <sub>4</sub> S <sub>3</sub> Si <sub>4</sub> |
| Fw                                              | 824.39                                                                         | 920.57                                                                                        |
| Color                                           | Dark Green                                                                     | Yellow                                                                                        |
| cryst syst                                      | Monoclinic                                                                     | Orthorhombic                                                                                  |
| space group                                     | P2 <sub>1</sub>                                                                | Pna2 <sub>1</sub>                                                                             |
| <i>a</i> (Å)                                    | 13.346(3)                                                                      | 24.360(6)                                                                                     |
| <i>b</i> (Å)                                    | 11.006(3)                                                                      | 11.062(3)                                                                                     |
| <i>c</i> (Å)                                    | 15.589(4)                                                                      | 17.424(5)                                                                                     |
| <i>α</i> (deg)                                  | 90                                                                             | 90                                                                                            |
| <i>β</i> (deg)                                  | 108.301(4)                                                                     | 90                                                                                            |
| <i>γ</i> (deg)                                  | 90                                                                             | 90                                                                                            |
| <i>V</i> (Å <sup>3</sup> )                      | 2173.8(9)                                                                      | 4695(2)                                                                                       |
| <i>Z</i>                                        | 2                                                                              | 4                                                                                             |
| <i>d</i> <sub>calcd</sub> (g cm <sup>-3</sup> ) | 1.259                                                                          | 1.302                                                                                         |
| <i>μ</i> (mm <sup>-1</sup> )                    | 1.523                                                                          | 1.546                                                                                         |
| <i>F</i> (000)                                  | 860                                                                            | 1912                                                                                          |
| cryst size (mm)                                 | 0.50 x 0.40 x 0.30                                                             | 0.40 x 0.30 x 0.20                                                                            |
| 2 <i>θ</i> range (deg)                          | 1.61 to 25.00                                                                  | 1.67 to 28.07                                                                                 |
| index range                                     | -15 ≤ <i>h</i> ≤ 15,<br>-13 ≤ <i>k</i> ≤ 13,<br>-18 ≤ <i>l</i> ≤ 13            | -32 ≤ <i>h</i> ≤ 32,<br>-14 ≤ <i>k</i> ≤ 7,<br>-23 ≤ <i>l</i> ≤ 22                            |
| no. of rflns collected                          | 11671                                                                          | 30667                                                                                         |
| no. of indep rflns                              | 7263                                                                           | 11252                                                                                         |
| R1, wR2 ( <i>I</i> > 2( <i>σ</i> ))             | 0.0397, 0.0913                                                                 | 0.0694, 0.1370                                                                                |
| R1, wR2 (all data)                              | 0.0516, 0.0984                                                                 | 0.2263, 0.1943                                                                                |
| goodness of fit, <i>F</i> <sup>2</sup>          | 0.967                                                                          | 0.928                                                                                         |
| no. of data/restraints/params                   | 7263 / 1 / 433                                                                 | 11252 / 1 / 461                                                                               |
| largest diff peaks, eÅ <sup>-3</sup>            | 0.597 to -0.281                                                                | 0.602 to -1.095                                                                               |

## References

- 1 Leung, W. -P.; So, C. -W.; Wu, Y. S.; Li, H. -W.; Mak, T. C. W. *Eur. J. Inorg. Chem.* **2005**, 513.
- 2 Sheldrick, G. M. In *Crystallographic Computing 3: Data Collection, Structure Determination, Proteins, and Databases*; Sheldrick, G. M., Kruger, C., Goddard, R., Eds; Oxford University Press: New York, 1985; p 175.
